# Supplementary material for: Contribution of SPI-1 bistability to Salmonella enterica cooperative virulence: insights from single cell analysis
Source: PubMed Central journal article supplement (PMC6173691; doi:10.1038/s41598-018-33137-z), 2018-10-05
Supplement: 41598_2018_33137_MOESM1_ESM.pdf [file 41598_2018_33137_MOESM1_ESM.pdf]

Contribution of SPI-1 bistability to *Salmonella enterica*  
cooperative virulence: insights from single cell analysis

María Antonia Sánchez-Romero and Josep Casadesús

**SUPPLEMENTARY MATERIAL**

**Table S1.** *S. enterica* strains constructed for this study

| Strain | Genotype                                                                              |
|--------|---------------------------------------------------------------------------------------|
| SV7884 | SL1344 <i>sipB</i> ::GFP (Cm <sup>R</sup> )                                           |
| SV8302 | SL1344 <i>sipB</i> ::mCherry (Km <sup>R</sup> )                                       |
| SV9244 | SL1344 $\Delta$ SPI-1::Km <sup>R</sup>                                                |
| SV9250 | SL1344 <i>sipB</i> ::mCherry ( Km <sup>R</sup> ) <i>ompC</i> ::GFP (Cm <sup>R</sup> ) |
| SV9418 | SL1344 <i>sipB</i> ::3xFLAG( Km <sup>R</sup> )                                        |
| SV8348 | SL1344 <i>prgH</i> ::GFP (Cm <sup>R</sup> ) inserted at the <i>putPA</i> locus*       |
| SV6806 | SL1344 <i>hilA</i> ::GFP (Cm <sup>R</sup> )                                           |

\* Constructed by P22 HT-mediated transduction using JH3010<sup>1</sup> as a donor.

1. Hautefort, I., Proença, M. J. & Hinton, J. C. D. Single-copy green fluorescent protein gene fusions allow accurate measurement of Salmonella gene expression *in vitro* and during infection of mammalian cells. *Appl. Environ. Microbiol.* **69**, 7480–7491 (2003).

**Table S2.** Oligonucleotides used in this study

| Oligonucleotide name | Sequence (5'-3')                                                                   |
|----------------------|------------------------------------------------------------------------------------|
| <b>SPI1P1</b>        | AGCATAACGGCATTGTTATCGAATCGCTCATAAAGCGTTTGTGTAG<br>GGAGCTGCTTC                      |
| <b>SPI1P2</b>        | TATAAGGCTTGCAGTCTTTCATGGGCAGCAAGTAACGTCTCATATG<br>TCCTCCTTAG                       |
| <b>sipB-GFP-FOR</b>  | AGCAAAATGCGGATGCTTCGCGTTTTATTCTGCGCCAGAGTCGCG<br>ATAAGAAGGAGATATACATATGAG          |
| <b>sipB-GFP-REV</b>  | ATTCCCACATTAATAACATATTTTTCTCCCTTTATTTTGGCAGT<br>ATCACTTATTCAGGCGTA                 |
| <b>sipB-mch-F</b>    | AGCAAAATGCGGATGCTTCGCGTTTTATTCTGCGCCAGAGTCGCG<br>ATAAGAAGGAGTATACATATGGTGAGCAAGGCC |
| <b>sipB-mCh-R</b>    | ATTCCCACATTAATAACATATTTTTCTCCCTTTATTTTGGCAGT<br>AATATCCTCCTTAGTTCC                 |
| <b>P1-sipB-F</b>     | AGCAAAATGCGGATGCTTCGCGTTTTATTCTGCGCCAGAGTCGCG<br>CTACAAAGACCATGACGG                |
| <b>P2-sipB-R</b>     | ATTCCCACATTAATAACATATTTTTCTCCCTTTATTTTGGCAGT<br>TATGAATATCCTCCTTAG                 |
| <b>hiIA-GFP-FOR</b>  | TTTGGTTCAAAGATGGAAACAGGATCCCCGCTTGATTAATTACG<br>TAAGAAGGAGATATACATATGAG            |
| <b>hiIA-GFP-FOR</b>  | CAACCAGATTACGATGATAAAAAAATAATGCATATCTCCTCTCTCA<br>TATCACTTATTCAGGCGTA              |

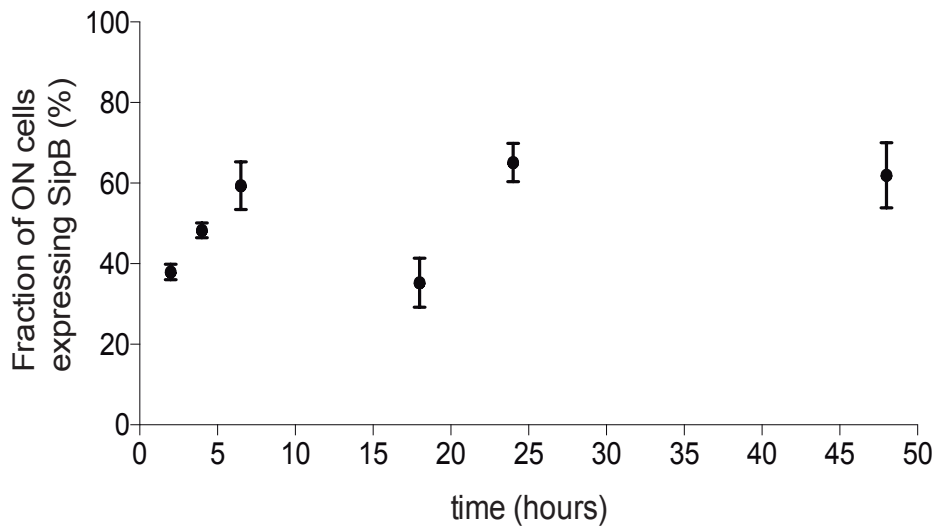

**Figure S1.** Fractions of SPI-1<sup>ON</sup> *Salmonella* cells at different stages of the cell cycle analyzed by immunostaining. The strain used was SV9418 (*sipB*::3xFLAG).

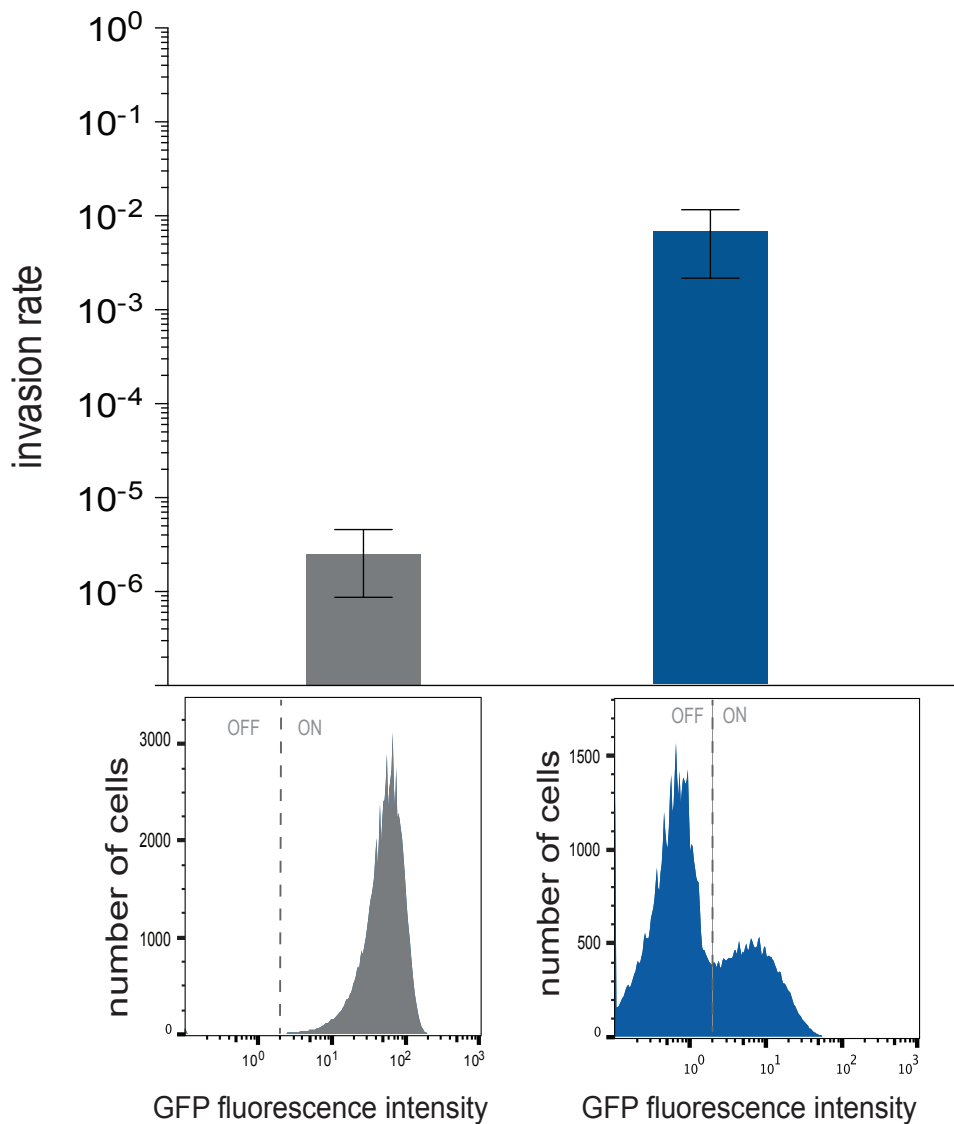

**Figure S2.** Invasion of epithelial cells by strain SV7884 (*sipB*::GFP) grown under growth conditions that permit unimodal or bimodal expression of SPI-1. Expression of *sipB*::GFP and invasion of epithelial cells were analyzed under aeration (grey bar and histogram) and under oxygen limitation (blue bar and histogram).
